# Supplementary material
Source: publisher site journal article supplement (https://zookeys.pensoft.net/article/84509/download/suppl/31/)
Supplement: Supplementary file

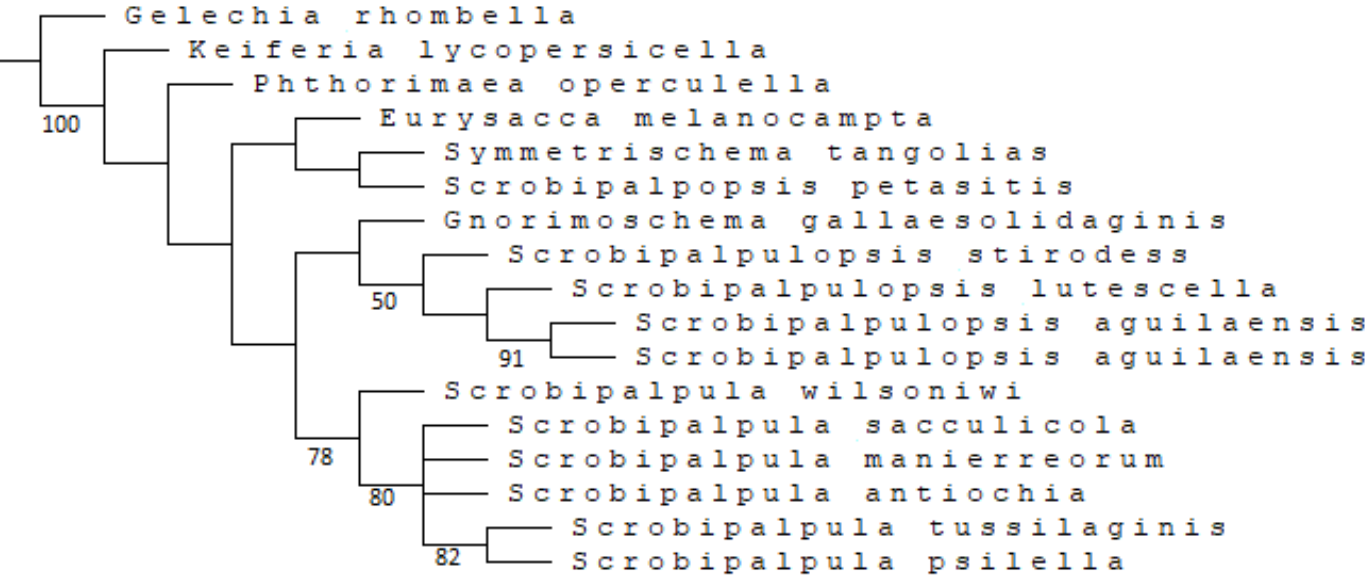

Strict consensus of two most parsimonious trees (453 steps) of *Scrobipalpulopsis aguilaensis* sp. nov. and representatives of Gnorimoschemini based on mitochondrial DNA sequences. Bootstrap values  $\geq 50$  are shown.

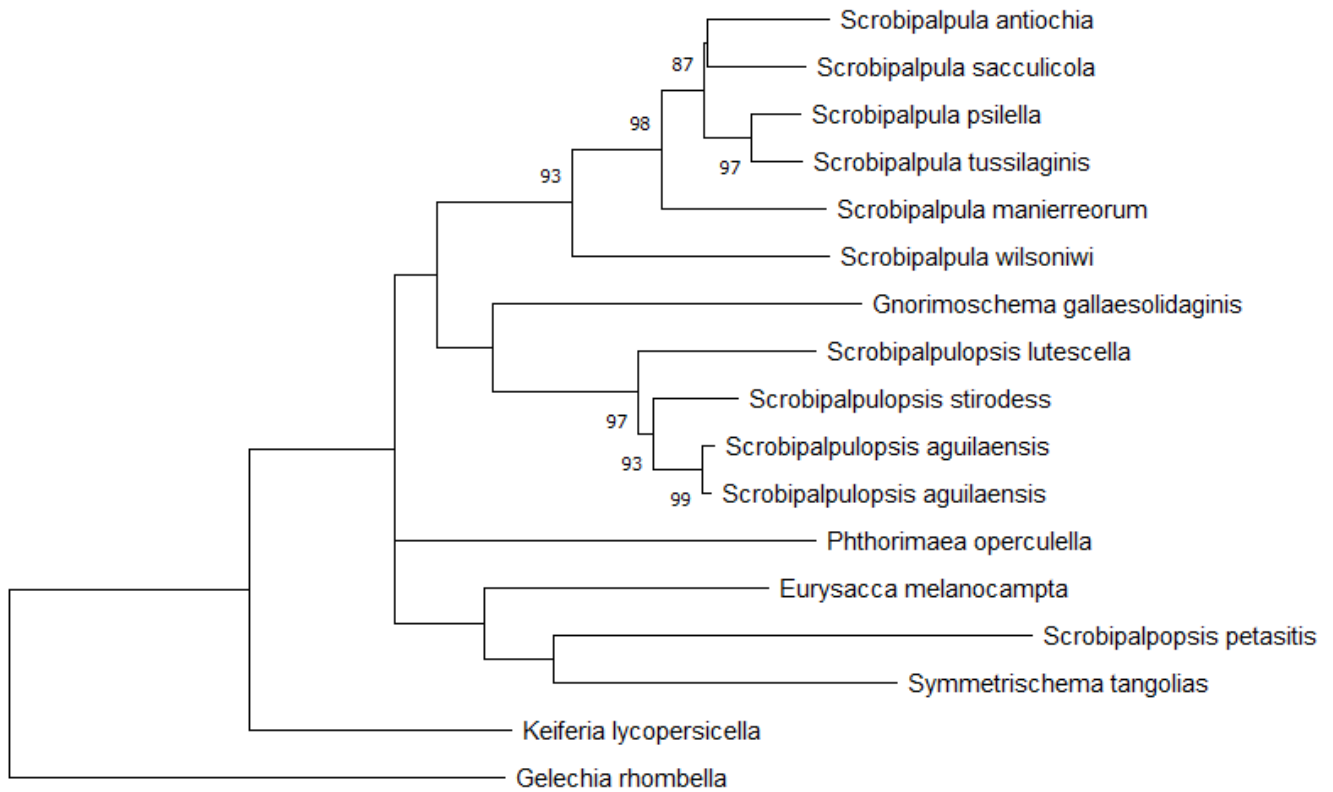

0.050

Maximum likelihood tree of *Scrobipalpus aguilaensis* sp. nov. and representatives of Gnorimoschemini based on mitochondrial DNA sequences. Bootstrap values >85 are shown.
